# Supplementary material for: GmWRI1c Increases Palmitic Acid Content to Regulate Seed Oil Content and Nodulation in Soybean (Glycine max)
Source: MDPI journal article supplement (doi:10.3390/ijms232213793), 2022-11-09
Supplement: s1 [file s1]

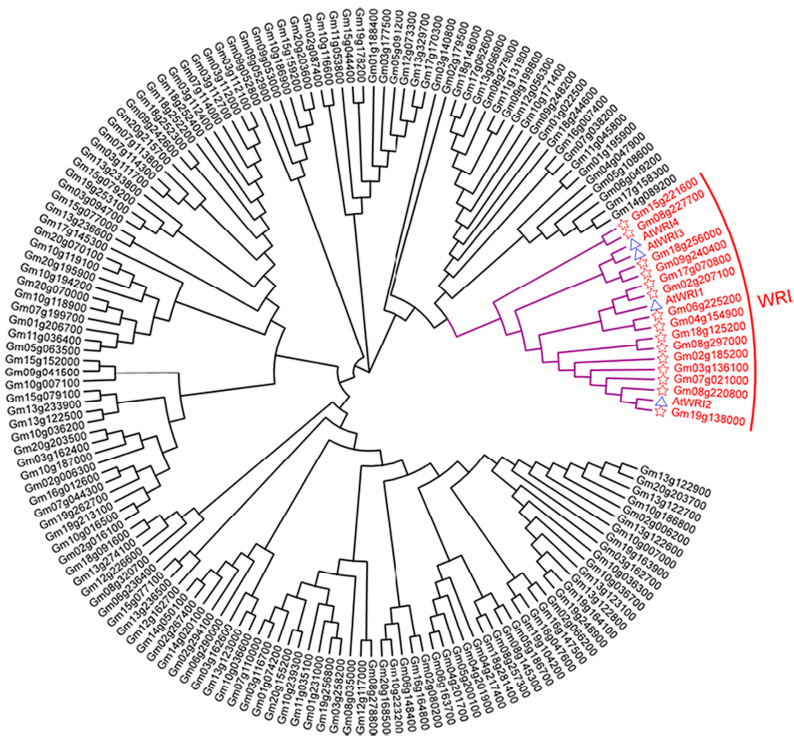

**Figure S1.** Unrooted phylogenetic tree of an AP2 transcription factor from Soybean. The alignment was generated using Clustal, and the unrooted phylogram was constructed with MEGA7 software using the neighbor-joining method.

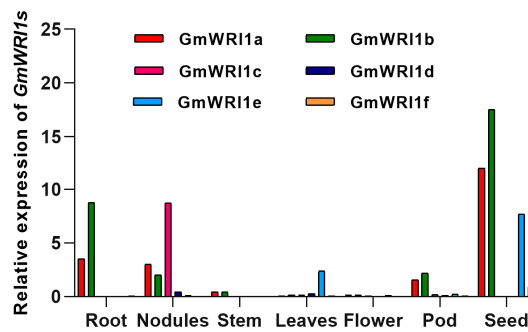

**Figure S2.** Expression patterns of *GmWRI1s* in different tissues of soybean plant. The public data are shown in phytozome (<https://phytozome.jgi.doe.gov/>).

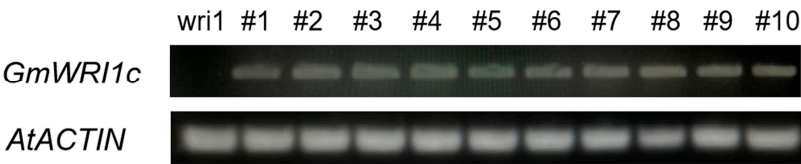

**Figure S3.** Identifying *atwri* transgenic plants of over-expressing *GmWRI1c*.

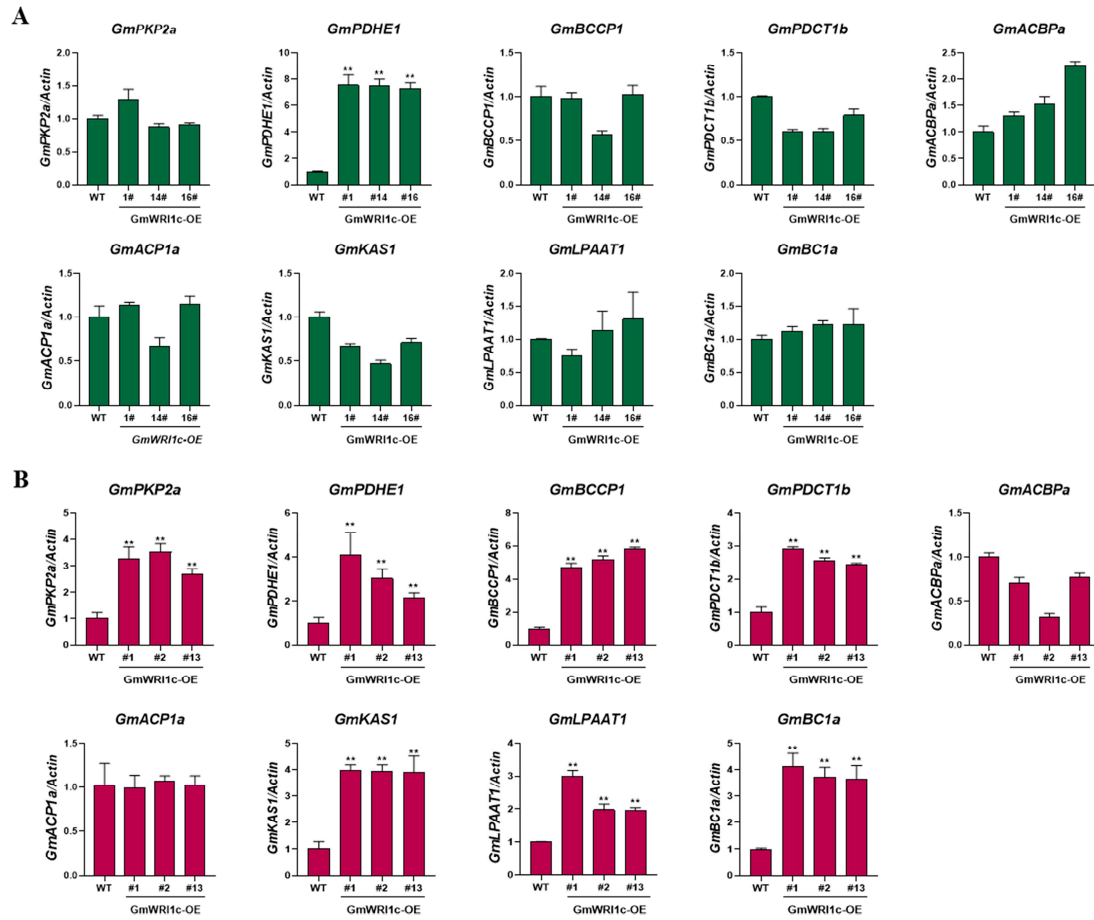

**Figure S4. Effects of *GmWRI1c* on glycolysis, lipid metabolism genes expression in soybean.**

(A) Expression levels of glycolysis and de novo fatty acid synthesis genes in hairy roots of transgenic plants. (B) Expression levels of glycolysis and de novo fatty acid synthesis genes in transgenic nodules. Expression levels were expressed as means  $\pm$  SD from three technical replicates. \*\* $P < 0.01$  by Student's  $t$ -test labeled for significant difference.

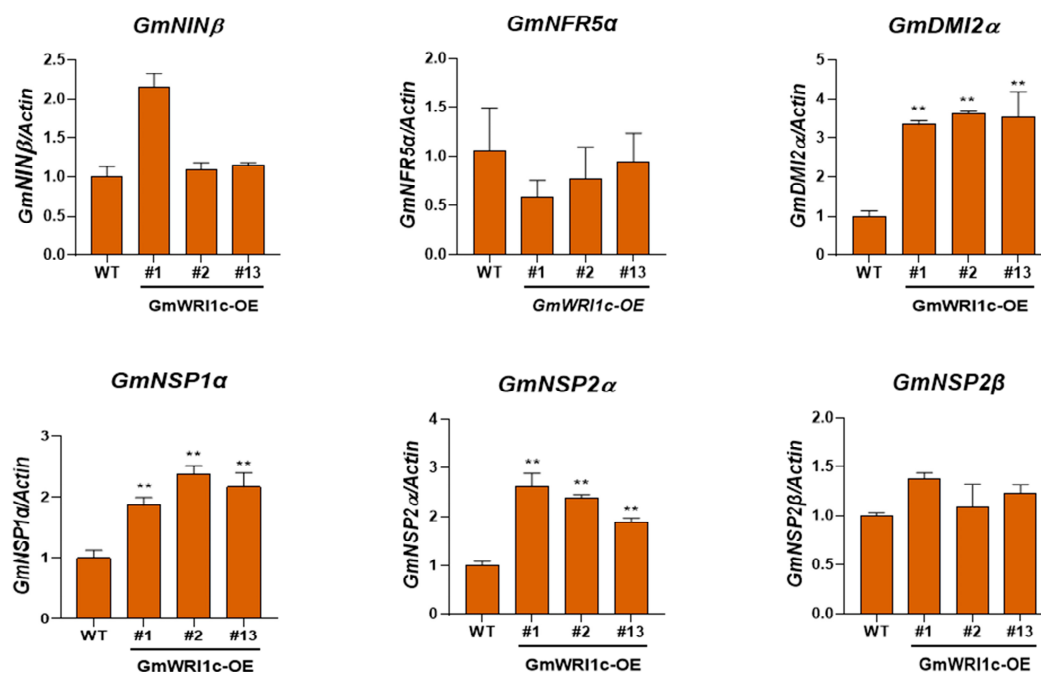

**Figure S5. Effects of *GmWRI1c* on nodulation genes expression in soybean.**

Expression levels were expressed as means  $\pm$  SD from three technical replicates.

\*\* $P < 0.01$  by Student's  $t$ -test labeled for significant difference.

**Figure S6**

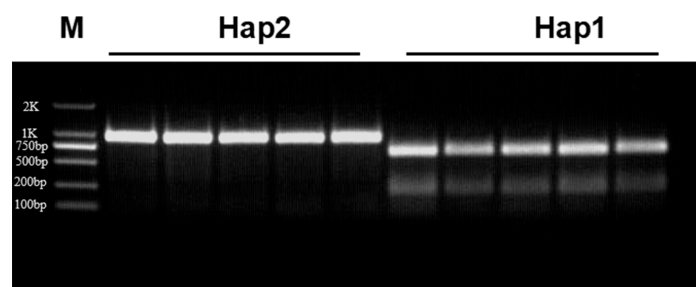

**Figure S6. CAPS molecular markers for detection two haplotypes of *GmWRI1c*.**

(M: DL 2000 Marker; 1-5: Hap2 Soybean varieties; 6-10: Hap1 Soybean varieties )

**Table S1. Primers used in this study.**

| Primers      | Gene ID | primer sequence(5'–3')                         |
|--------------|---------|------------------------------------------------|
| GmWRI1c(C/G) |         | AATACTCGGACACTCCCACCT<br>ATTCTAACCTCCCATACCCAT |

|                 |                 |                                                                       |
|-----------------|-----------------|-----------------------------------------------------------------------|
| GmWRI1c-cds     |                 | TCTAGAATGGTAATGATGAAAGAGAATATTATTG<br>GGATCCAAATATTGAGTGCAGGTCTCTTTCC |
| GmWRI1c-Pro     |                 | AGGCCTCCACCTTACCTATAACTATTTGC<br>CCTAGGTTCTTTTGTATTGTGATGTTCTAACTG    |
| GmWRI1c-Genomic |                 | GCAAATTATAAGAACAACACACACCTC<br>GGGATTGCTTTTTGTTAAGAAGAACTTC           |
| LBb1.3          |                 | ATTTTGCCGATTTCGGAAC                                                   |
| LP (wri1)       |                 | AAAAACAGGCATCACCACAAC                                                 |
| RP (wri1)       |                 | TTTGTTTCGGAGGACAAAGATG                                                |
| qRT-GmActin     | Glyma.19G147900 | CTTCCCTCAGCACCTTCCAA<br>GGTCCAGCTTTCACACTCCAT                         |
| qRT-AtActin     | AT5G09810       | CCTCAGCACCTTCCAACAGATG<br>AACTCACCACCACGAACCAGAT                      |
| qRT-GmWRI1c     | Glyma.18g256000 | GAAGTTCTTCTTAACAAAAAGCAATCCCC<br>CAATGAAAAGCATGTATTGATGCAATTTAAC      |
| qRT-GmACP1a     | Glyma.13g214600 | CCCTTTCAATTAAGGGAAGAAGT<br>CTGATTCATCTGGCAGTGCCAA                     |
| qRT-GmACP1b     | Glyma.15g098500 | TTCCCAATCTAGTTATGGTACCC<br>TCTTA ACTATGTGGCACACCTTCT                  |
| qRT-GmPDCT1a    | Glyma.08g213100 | CGACGGCGCTAAAGGCGT<br>GCAGGAGTGCTTGGAAGAG                             |
| qRT-GmPDCT1b    | Glyma.07g029800 | CTATCCACAACCCACAGAGCAC<br>TCAGACTCTTGCCCTCTCACTC                      |
| qRT-GmPKP2a     | Glyma.09g126300 | TAGCTGCCTCACGATCCATTC<br>TGAAGGCCTCTGAGGCTGAG                         |
| qRT-GmPKP2b     | Glyma.16g173100 | ATGGCTCAGGTCGTGGCTT<br>TGTTCTCTCCCAATGGGAACA                          |
| qRT-GmPPCK1     | Glyma.10g166600 | TCTCCATAGTAATGGATCTCTGCC<br>GAAGTCCGCCAGTTTAAGATTGT                   |

|              |                 |                                                       |
|--------------|-----------------|-------------------------------------------------------|
| qRT-GmPDHE1  | Glyma.05g141000 | CGTCATTGTCTTCTTCCAACCTC<br>TTCAGAACCTTGCTGCTTACC      |
| qRT-GmDLD1a  | Glyma.07g241600 | CCCAGGACTTCCAAAATATTCAT<br>GAGCATAAGCATCTTTGACAGGC    |
| qRT-GmBCCP1  | Glyma.18g265300 | AAGCACAACCAAAAGAGGCTG<br>GCATCAGCAGAAGTGCTTGG         |
| qRT-GmBC1a   | Glyma.05g221100 | GTGCAAGTCCATTAGCTCGC<br>GCTAACTTGACCGACTTGCCTA        |
| qRT-GmKAS1   | Glyma.08g084300 | CTTTCTCAGAGGAACGACGACC<br>CAGCTCCTCCCAAATATTCAGC      |
| qRT-GmACBPα  | Glyma.04g122900 | TTATGGATTGTACAAGCAGGCC<br>AGTGATGTAATCACTCATTGCTTCG   |
| qRT-GmLPAAT1 | Glyma.17g131500 | GTCCATGGATTCTATGGCCACT<br>CGACGACGGAGGAGTAGAGG        |
| qRT-GmMCAT   | Glyma.18g057700 | GCTCTCAAGCACTCTCTCCCTC<br>CCCCAAAATGTCATTTGCCTT       |
| qRT-GmNINα   | Glyma.04g000600 | TAACATGCGATGCTGATCTTG<br>TGATTTAGAGGCGAAGCTTGA        |
| qRT-GmNINβ   | Glyma.02g311000 | CACCAACATCTTGAGTCTCTACC<br>TCTGCAAATCTCTGAATCCCCA     |
| qRT-GmNFR1α  | Glyma.02g270800 | ATTCACGAGCACACTGTGCCT<br>CCAAAATCTGCAACCTTTCC         |
| qRT-GmNFR5α  | Glyma.01g179100 | TTCCCTTTCTTCCTCTCCAC                                  |
| qRT-GmDMI2α  | Glyma.01g020100 | GTCCTCAGTGGCCTTGACATT<br>ACACCCTTTTGCCTGCTTTG         |
| qRT-GmDMI2β  | Glyma.09g202300 | CTGAGCGATTACAGTTCATGCA<br>TGCCTGCTTTGACAGTGCTATT      |
| qRT-GmNSP1α  | Glyma.16g008200 | CAACACTTATCTTCTTCTCCAACCT<br>GGAAGCATTTGCTATGTTGTTAGG |

|                     |                 |                                                     |
|---------------------|-----------------|-----------------------------------------------------|
| qRT-GmNSP1 $\beta$  | Glyma.07g039400 | CACAACATCTATCATCTTCTCCC<br>GGAAGCATTTGCTATGTTGTTAGG |
| qRT-GmNSP2 $\alpha$ | Glyma.06g110800 | GTGACTTTGGTGGAGGAGGAG<br>CGAGTCAAAGACCGCTGAATA      |
| qRT-GmNSP2 $\beta$  | Glyma.07g039400 | AATCATTGCCAAGCGAAGCT<br>AGTCCAAAGCGAGGCAGAGA        |
| qRT-GmENOD40-1      | Glyma.01G028500 | TCTCTCTTGAGTGGCAGAAGCA<br>TGGAGTCCATTGCCTTTTCG      |
| qRT-GmENOD40-2      | Glyma.02G036800 | GAGTGCGGAAGCAGATACAC<br>CTACATAGCCATAGAGACCCCAA     |

**Table S2. Identified five polymorphic sites were associated with seed oil content.**

| Pos          | polymorphic site | F           |             | p           |             |
|--------------|------------------|-------------|-------------|-------------|-------------|
|              |                  | 2017        | 2018        | 2017        | 2018        |
| Chr-54486578 | T/G              | 11.29070598 | 9.960466219 | 0.001784193 | 0.003125551 |
| Chr-54486798 | ../TA            | 11.29070598 | 9.960466219 | 0.001784193 | 0.003125551 |
| Chr-54486825 | C...../GCCAAATA  | 11.29070598 | 9.960466219 | 0.001784193 | 0.003125551 |
| Chr-54487077 | C/G              | 11.29070598 | 9.960466219 | 0.001784193 | 0.003125551 |
| Chr-54487121 | T/C              | 11.29070598 | 9.960466219 | 0.001784193 | 0.003125551 |

**Table S3. The seed oil content and relative expression of *GmWRI1c* in ten soybean accessions.**

| Variety code | Sample type | Oil content-Avg(%) | Haplotype | Relative expression of <i>GmWRI1c</i> in nodules |
|--------------|-------------|--------------------|-----------|--------------------------------------------------|
| JLCLX        | Cultivar    | 17.24              | Hap2      | 1.00                                             |
| ZDD12330     | Landrace    | 19.17              | Hap2      | 1.04                                             |
| ZDD15733     | Landrace    | 19.14              | Hap2      | 0.51                                             |
| ZDD24126     | Cultivar    | 17.92              | Hap2      | 0.76                                             |

|          |          |       |      |      |
|----------|----------|-------|------|------|
| ZDD15808 | Landrace | 18.07 | Hap2 | 0.63 |
| ZDD24847 | Cultivar | 21.57 | Hap1 | 1.68 |
| L08Q104  | Cultivar | 25.37 | Hap1 | 3.01 |
| An1498   | Cultivar | 24.55 | Hap1 | 5.65 |
| WDD00596 | Cultivar | 23.78 | Hap1 | 4.62 |
| ZDD24601 | Cultivar | 24.88 | Hap1 | 3.00 |
